# 1 **Depression and its associated factors among COVID-19 survivors in a middle income country**

2 \*Foong Ming Moy<sup>1</sup>, Eugene Ri Jian Lim<sup>2</sup>, Noran Naqiah Hairi<sup>1</sup> and Awang Bulgiba<sup>1</sup>

3 <sup>1</sup>Centre for Epidemiology and Evidence-based Practice, Department of Social & Preventive Medicine,  
4 Faculty of Medicine, University of Malaya, 50603 Kuala Lumpur, Malaysia

5 <sup>2</sup>School of Medicine, International Medical University, 57000 Kuala Lumpur, Malaysia

6

7 \*Corresponding author (Email: [moyfm@ummc.edu.my](mailto:moyfm@ummc.edu.my))

8

## 9 **Abstract**

10 **Introduction:** COVID-19 survivors who have mental health issues are more likely to have a lower  
11 quality of life, reduced work productivity, social troubles, and other health issues. However,  
12 information on the mental health of COVID-19 survivors is scarce. Therefore, we aimed to determine  
13 the COVID-19 survivors' mental health status in the form of depression and its associated factors.

14 **Methods:** This was a cross-sectional study conducted in Malaysia, from July to September 2021,  
15 during a nationwide lockdown. Data was collected using an online questionnaire shared on social and  
16 news media. Socio-demographic variables, comorbidities, self-perception of health, information on  
17 the person's acute condition during COVID-19 infection, symptoms and duration of symptoms post-  
18 COVID, and state of depression were gathered. The Patient Health Questionnaire 9 was used to assess  
19 depression. Factors associated with mild to severe depression were analysed using both univariable  
20 and multivariable logistic regression analyses.

21 **Results:** A total of 732 COVID-19 survivors responded to the survey. The respondents were mainly  
22 females and of younger age (in their 20s and 30s). Two-thirds perceived themselves to be in good  
23 health. One in five reported to have experienced Long COVID. Slightly less than half (47.3%) of the  
24 respondents had mild to severe depression (total PHQ-9 score of 5 -27). In the multivariable analysis,  
25 being female (aOR: 1.68; 95% CI: 1.08,2.62), of younger age (20s – aOR: 3.26; 95% CI: 1.47, 7.25; 30s  
26 – aOR: 2.08; 95% CI: 1.05, 4.15; and 40s – aOR: 2.43; 95% CI: 1.20, 4.90; compared to those in the 50s  
27 and above), being overweight/obese (aOR: 1.83; 95% CI: 1.18, 2.83), having Long COVID (aOR: 2.45;  
28 95% CI: 1.45, 4.16) and perceiving to have poorer health (aOR: 4.54; 95% CI: 2.89, 7.13) were  
29 associated with mild to severe depression.

30 **Conclusion:** Females, younger age groups, being overweight/obese, having Long COVID and perceiving  
31 to be in poor health were factors associated with higher odds for mild to severe depression.

32 (308 words)

33

**NOTE:** This preprint reports new research that has not been certified by peer review and should not be used to guide clinical practice.

34 **Introduction:**

35 SARS-CoV-2 has quickly spread all over the world. Globally, the COVID-19 pandemic has had numerous  
36 catastrophic consequences in terms of economic loss, morbidity, and mortality. As of 8 December  
37 2022, the COVID-19 pandemic has caused 6.6 million deaths and 652 million confirmed cases  
38 worldwide. SARS-CoV-2 affects the respiratory, nervous, renal, and cardiovascular systems[1] . With  
39 the increase in COVID-19 cases, mental health issues are also now being recognized as a consequence  
40 of COVID-19 infection [2, 3].

41  
42 Both acute and long-term mental health problems have been linked to COVID-19 infection [4]. The  
43 aetiology of mental health consequences during acute COVID-19 is complex. Direct impacts of viral  
44 infection, cerebrovascular illness, physiological impairment, immunological response, medical  
45 treatments, social isolation, the psychological impact of severe and possibly deadly COVID-19, worry  
46 about infecting others, and stigma may all play a role [5].

47  
48 COVID-19 survivors are also more likely to have mental health problems in the post-COVID phase [6,  
49 7] compared to the general population. These COVID-19 survivors may experience worry, fear, guilt  
50 or helplessness as they are more likely to be affected by the stigma of being labelled as an ex-COVID-  
51 19 patient. They face uncertainty about their prognosis and future, which predispose them to higher  
52 risk of mental health problems. According to a review by Thye et al [4], acute COVID-19 patients had  
53 a significant prevalence of anxiety (38.5%) and depression (35.9%), with post-infection anxiety ranging  
54 from 6.5 to 63%. COVID-19 survivors who have mental health issues are more likely to have a worse  
55 quality of life, reduced work productivity, social problems, abuse vulnerability, and other health issues  
56 [2, 8].

57  
58 Depression is a common mental health problem globally. The frequency of depressive symptoms  
59 reported more than 12 weeks following SARS-CoV-2 infection range from 11 to 28% [9]. Being female,  
60 having lower education levels or with chronic diseases are risk factors for depression among COVID-  
61 19 survivors [10]. Life events such as loss of a loved one (i.e., parents, spouse or siblings) may also  
62 contribute to depression [11]. Lifestyle factors such as poor sleep, poor nutrition, stress and substance  
63 abuse are other risk factors for depression [12].

64  
65 In Malaysia, there are more than 5 million COVID-19 survivors in the community [13], but there is little  
66 data on the mental health status of these patients recovering from COVID-19. In contrast, there have  
67 been a number of reports from other countries [14-16]. Considering the negative effects of depression

68 on health-related quality of life and daily functioning, it is crucial to examine if COVID-19 survivors  
69 experience depression so that timely intervention can be provided. Therefore, we aimed to  
70 investigate the mental health status in the form of depression among COVID-19 survivors in the  
71 community and its associated factors.

72

### 73 **Methods:**

74 From July to September 2021, a cross-sectional study was undertaken in Malaysia, an upper middle-  
75 income country, during the execution of a nationwide lockdown. Data was gathered utilizing an online  
76 questionnaire, the REDCap electronic data capture tools [17, 18] hosted at our university (University  
77 of Malaya).

78

79 To accommodate the multiethnic community, the questionnaire was written in English and translated  
80 into Malay and Chinese. All COVID-19 survivors were invited to participate via the social media, the  
81 COVID-19 support group's website, and in the news media in the aforementioned languages. The  
82 survey was anonymous, and no personally identifying information such as name, phone number, or  
83 email address were collected. However, respondents were given the option of being contactable (by  
84 leaving their email addresses) in case the researchers determined that their condition warranted extra  
85 attention or follow-up with additional activities or support.

86

87 Ethical clearance was obtained from the University of Malaya Research Ethics Committee (Reference  
88 number: UM.TNC2/UMREC\_1439). Written informed consent was obtained from all participants. The  
89 inclusion criteria were all Malaysian adults (aged 18 years and above) who had previously been  
90 infected by COVID-19. In 2020-2021, all COVID-19 cases were confirmed via reverse transcription  
91 polymerase chain reaction (RT-PCR) tests.

92

93 Referring to the study by Mei et al [10] on depression among COVID-19 survivors, using risk factors  
94 for depression such as females (OR=3.4), those with a low income level (OR=2.4) and those with a  
95 comorbid chronic disease (OR=2.8), the required calculated sample size with a power of 80% and 95%  
96 confidence interval, ranged from 276 to 606.

97

98 The questionnaire asked about socio-demographic variables, comorbidities, self-perception of health,  
99 information on the person's acute condition during COVID-19 infection, symptoms and duration of  
100 symptoms post-COVID, and mental health state (depression). The severity of condition during the  
101 acute infection was self-perceived, with categories of no symptoms, mild, moderate and severe

102 (requiring oxygen supplementation). Long COVID was defined as a state of poor health with post-  
103 COVID symptoms that lasted more than 12 weeks after an acute COVID-19 infection which could not  
104 be explained by any other illness[19].

105

106 Depression was measured using the Patient Health Questionnaire 9 (PHQ-9)[20]. The PHQ-9 is made  
107 up of nine items that asks about sleep, tiredness, changes in appetite, concentration problems, and  
108 suicidal thoughts in the last two weeks. The total score was determined by summing the raw scores  
109 of each item for a total ranging from 0 to 27. The total scores were divided into five categories namely  
110 normal/minimal with score of 0 – 4, mild 5-9, moderate 10-14, moderately severe 15-19 and severe  
111 20 -27. In the current analysis, the total PHQ-9 scores were divided into two categories which were  
112 normal (0–4) and abnormal (5–27) scores indicating mild to severe depression, similarly used by other  
113 researchers [21-23] .

114

115 Data from RedCap were exported into the SPSS version 23 software for data analysis. Normally  
116 distributed data was presented using mean with standard deviation (SD), while skewed data were  
117 presented using median with inter-quartile range (IQR). Categorical variables were presented using  
118 frequency with percentage. Independent variables were cross-tabulated with the categories of PHQ-  
119 9 (normal vs abnormal). Chi-square tests were conducted for each variable, and the p-values obtained  
120 were presented. For each independent variable, univariable logistic regression models were used to  
121 obtain crude Odds Ratios with 95% confidence intervals. We then performed multivariable logistic  
122 regression to determine the adjusted Odds Ratios with 95% confidence intervals. To obtain the final  
123 model, we included all independent variables which had p-values of 0.25 or less during univariable  
124 analysis and any variables which were deemed to be clinically significant. This is in keeping with the  
125 “purposeful selection algorithm” proposed by Hosmer and Lemeshow [24]. Significance level was  
126 preset at  $p < 0.05$ .

127

## 128 **Results:**

129 A total of 732 COVID-19 survivors responded to the survey. The mean ( $\pm$  standard deviation) duration  
130 between COVID-19 infection and data collection was 27.3 ( $\pm$  12.5) weeks. The respondents were  
131 mainly females, of younger age (in their 20s and 30s) and had at least a bachelor’s degree (Table 1).  
132 About 50% of them were overweight or obese and the majority were free of comorbidities (74%).  
133 About half of them had no symptoms or only had mild symptoms during their acute COVID-19  
134 infection, with 25.9% being hospitalized. One-third of respondents perceived themselves to be in poor

135 health at the time of survey. One in five were found to be experiencing Long COVID, based on their  
136 self-reported duration of symptoms experienced post-COVID.  
137  
138

139 Table 1: Socio-demographic characteristics, Body Mass Index (BMI) categories, comorbidities and  
140 medical history of respondents

|                                                |                           | n (%)      |
|------------------------------------------------|---------------------------|------------|
| Sex<br>(n=732)                                 | Males                     | 302 (41.3) |
|                                                | Females                   | 430 (58.7) |
| Age groups<br>(n=611)                          | Twenties                  | 156 (25.5) |
|                                                | Thirties                  | 224 (36.7) |
|                                                | Forties                   | 33 (5.4)   |
|                                                | Fifties                   | 84 (13.7)  |
| Mean age = 40.2±10.9                           | Sixties                   | 114 (18.7) |
|                                                |                           |            |
| Education levels<br>(n=732)                    | Secondary and lower       | 103 (14.1) |
|                                                | Diploma                   | 142 (19.4) |
|                                                | Bachelor's degree         | 341 (46.6) |
|                                                | Master's degree or higher | 146 (19.9) |
| BMI* categories<br>(n=727)                     | Underweight               | 40 (5.5)   |
|                                                | Normal weight             | 281 (38.7) |
|                                                | Overweight                | 219 (30.1) |
|                                                | Obese                     | 187 (25.7) |
| Comorbidities**<br>(n=728)                     | Free of comorbidities     | 541 (73.9) |
|                                                | Diabetes mellitus         | 50 (6.9)   |
|                                                | Hypertension              | 109 (15.0) |
|                                                | Heart disease             | 16 (2.2)   |
|                                                | Hypercholesterolemia      | 123 (16.9) |
|                                                | Cancers                   | 10 (1.4)   |
| Categories of acute<br>COVID-19 (n= 634)       | No symptom                | 71(11.2)   |
|                                                | Mild                      | 287 (45.3) |
|                                                | Moderate                  | 202 (31.9) |
|                                                | Severe (with oxygen)      | 74 (11.7)  |
| Long COVID<br>(n=598)                          | Yes                       | 126 (21.1) |
|                                                | No                        | 472 (78.9) |
| Perceived in current<br>good health<br>(n=732) | Yes                       | 494 (67.5) |
|                                                | No                        | 238 (32.5) |

141 Footnote:

142 \*underweight (<18.5kg/m<sup>2</sup>), normal weight (18.5-24.9kg/m<sup>2</sup>), overweight (25.0–29.9kg/m<sup>2</sup>), obese  
143 (>30.0kg/m<sup>2</sup>)

144 \*\*the numbers did not add up to 100% as some respondents experienced more than one  
145 comorbidity

146 A total of 567 respondents (77.5%) answered the section on PHQ-9. There were no significant  
147 differences ( $p>0.05$ ) in terms of sex, age groups, BMI groups, education levels, comorbidities, and  
148 experience of Long COVID between those who answered the PHQ-9 compared to those who did not.  
149 However, those who had mild symptoms during their acute COVID-19 infection were less likely to  
150 answer PHQ-9. The median PHQ-9 total score was 4 with an Inter Quartile Range (IQR) of 9. A total  
151 of 52.7% of the respondents had normal PHQ-9 scores (0 -4). There were 21.9% of the respondents  
152 with mild depression (5 – 9), followed by 13.8% with moderate (10 – 14), 7.2% moderately severe (15  
153 – 19) and 4.4% with severe depression (20 -27), which made up a total of 47.3% with abnormal scores  
154 for PHQ-9. The subsequent analyses used a binary outcome with normal (0 – 4) and abnormal (5 –  
155 27) categories, which the abnormal category indicated mild to severe depression.

156

157 In the bivariable analysis (Table 2), sex, age groups, BMI categories, severity of acute COVID-19, Long  
158 COVID, perception of poor health at the time of survey were significantly associated with mild to  
159 severe depression ( $p<0.05$ ). On the other hand, comorbidities and education levels were not  
160 associated with mild to severe depression. In the multivariable analysis (Table 2), being female, of  
161 younger age (20s, 30s and 40s compared to those in the 50s and above), being overweight/obese,  
162 having Long COVID and having perception of poorer health at the time of survey were associated with  
163 higher odds for mild to severe depression.

164

165

166

167

168

169

170

171

172

173

174

175

176 Table 2: Factors associated with PHQ-9 categories

| n=567                                   | PHQ-9      |            |         |                      |                          |
|-----------------------------------------|------------|------------|---------|----------------------|--------------------------|
|                                         | Normal     | Abnormal   | p-value | Crude OR<br>(95% CI) | *Adjusted OR<br>(95% CI) |
| <b>Sex</b>                              |            |            |         |                      |                          |
| Male                                    | 136 (60.4) | 89 (39.6)  | 0.003   | Reference            | Reference                |
| Female                                  | 163 (47.7) | 179 (52.3) |         | 1.68 (1.19, 2.36)    | 1.68 (1.08,2.62)         |
| <b>Age group</b>                        |            |            |         |                      |                          |
| Twenties                                | 44 (46.3)  | 51 (53.7)  | 0.037   | 2.19 (1.19, 4.04)    | 3.26 (1.47, 7.25)        |
| Thirties                                | 95 (52.8)  | 85 (47.2)  |         | 1.69 (0.98, 2.92)    | 2.08 (1.05, 4.15)        |
| Forties                                 | 56 (46.7)  | 64 (53.3)  |         | 2.16 (1.21, 3.87)    | 2.43 (1.20, 4.90)        |
| Fifties and above                       | 53 (65.4)  | 28 (34.6)  |         | Reference            | Reference                |
| <b>Education levels</b>                 |            |            |         |                      |                          |
| Secondary and below                     | 38 (45.2)  | 46 (54.8)  | 0.329   | 1.42 (0.89, 2.29)    | 1.73 (0.95, 3.29)        |
| Diploma                                 | 62 (53.9)  | 53 (46.1)  |         | 1.01 (0.66,1.53)     | 1.33 (0.78, 2.25)        |
| Degree and above                        | 199 (54.1) | 169 (45.9) |         | Reference            | Reference                |
| <b>Perceived in current good health</b> |            |            |         |                      |                          |
| Yes                                     | 251 (66.4) | 127 (33.6) | <0.001  | Reference            | Reference                |
| No                                      | 48 (25.4)  | 141 (74.6) |         | 5.81 (3.93, 8.58)    | 4.54 (2.89, 7.13)        |
| <b>BMI categories</b>                   |            |            |         |                      |                          |
| Under-Normal weight                     | 142 (57.7) | 104 (42.3) | 0.026   | Reference            | Reference                |
| Overweight-Obese                        | 152 (48.3) | 163 (51.7) |         | 1.46 (1.05, 2.05)    | 1.83 (1.18, 2.83)        |
| <b>Any comorbidities</b>                |            |            |         |                      |                          |
| Yes                                     | 76(49.4)   | 78(50.6)   | 0.324   | 1.21 (0.83, 1.75)    | 1.29 (0.75, 2.20)        |
| No                                      | 223 (54.0) | 190 (46.0) |         | Reference            | Reference                |
| <b>Severity of acute COVID</b>          |            |            |         |                      |                          |
| No symptom                              | 40 (72.7)  | 15 (27.3)  | 0.001   | Reference            | Reference                |
| Mild                                    | 146 (55.9) | 115 (44.1) |         | 2.10 (1.11,3.99)     | 1.49 (0.73, 3.08)        |
| Moderate                                | 82 (45.6)  | 98 (54.4)  |         | 3.18 (1.64, 6.18)    | 2.19 (1.02, 4.69)        |
| Severe (with oxygen)                    | 29 (42.6)  | 39 (57.4)  |         | 3.59 (1.67, 7.69)    | 2.41 (0.93, 6.22)        |
| <b>Long COVID</b>                       |            |            |         |                      |                          |
| No                                      | 262 (58.5) | 286 (41.5) | <0.001  | Reference            | Reference                |
| Yes                                     | 37 (31.3)  | 82 (68.9)  |         | 3.12 (2.03, 4.81)    | 2.45 (1.45, 4.16)        |

177



178 **Discussion:**

179 Less than half of our respondents reported to be experiencing mild to severe depression. Females,  
180 younger respondents, being overweight/obese, having Long COVID and perception of poorer health  
181 were factors associated with mild to severe depression among these COVID-19 survivors.

182

183 As we used an online questionnaire, respondents were more likely to be of younger age with higher  
184 levels of education. People who were older and had less education were therefore under-represented.  
185 There were also more females who answered the survey. The majority of respondents were free of  
186 comorbidities such as hypertension, diabetes or heart disease, since they were younger. On the other  
187 hand, half of them were overweight or obese, which is similar to what has been found in a Malaysian  
188 national survey [25].

189

190 In comparison to before they were infected with COVID-19, one-third of the respondents perceived  
191 themselves to be in poor health at the time of survey. Furthermore, one in five respondents  
192 experienced Long COVID based on their reported post-COVID symptoms and duration. Fatigue, brain  
193 fog, depression, anxiety, insomnia, arthralgia, and myalgia were the most often reported symptoms  
194 of Long COVID among our respondents, as reported in another publication [26] . A living systematic  
195 review on Long COVID [27] reported that weakness, general malaise, fatigue, concentration  
196 impairment and breathlessness were the most common symptoms. Feeling anxious and depressed  
197 were also among the common symptoms experienced by COVID-19 survivors [27, 28]. The underlying  
198 mechanism is likely to be multifactorial and might include the direct effects of viral infection,  
199 immunological response, corticosteroid therapy, ICU stay, social isolation, and stigma [5].

200

201 Similar to other studies among COVID-19 patients, females were consistently found to be more prone  
202 to depression [4, 29]. Females appear to be protected against severe symptoms and deaths, and they  
203 recover more quickly from COVID-19, presumably due to oestrogen protection [30]. On the other hand,  
204 they may suffer severe economic and psychological consequences as a result of COVID-19 infection in  
205 the short and long term. Females may have more responsibilities towards their families, children, and  
206 the elderly in addition to being in employment. Thus, long-term stressors that happened during the  
207 COVID-19 pandemic may have a greater impact on them [31, 32].

208

209 Compared to the oldest age group, those in their 20s, 30s and 40s had higher odds for mild to severe  
210 depression. The younger age groups may have more concerns about their future, their employment  
211 during lockdown (data collection was conducted during the nationwide lockdown). They may also

212 have poorer mental resilience compared to the older age groups [29, 33]. Older respondents maybe  
213 more likely to have faced a number of major life events than the younger respondents. Therefore,  
214 the older respondents may have more experience to face adversity better [33].

215

216 Respondents who were overweight or obese also had higher odds for mild to severe depression.  
217 There is a reciprocal link between depression and obesity. Obesity is found to increase the risk of  
218 depression, in addition, depression was also found to be predictive of obesity [34]. Obesity is an  
219 inflammatory condition, and it has been proven that gaining weight activates inflammatory pathways.  
220 Inflammation, in turn, has been linked to depression.

221

222 The severity of acute COVID-19, Long COVID experience and the perception of poorer health were  
223 significantly associated with mild to severe depression. Higher odds for Long COVID have been seen  
224 in respondents who had more severe acute COVID-19 [35]. Respondents having Long COVID may  
225 perceived their current health to be poor as they were still experiencing post-COVID symptoms. A  
226 collinearity diagnostic was carried out to test if these variables were collinear with each other.  
227 However, we did not find any collinearity among these variables. The severity of acute COVID-19 and  
228 the experience of Long COVID may be in the past, while the perception of poor health was current at  
229 the time of survey. These three factors may have some association with abnormal PHQ-9 scores  
230 regardless of their timing. Those who had severe acute COVID-19 may still experience some post-  
231 COVID symptoms or Long COVID which may cause them to perceive their health to be poorer at the  
232 time of survey. They may also be worried and fearful of their slow recovery which may affect their  
233 work productivity and health-related quality of life [5].

234

235 There might be a bidirectional association between subjectively poorer health perception and  
236 depression. On one hand, a negative or middling view of one's health may be linked to more severe  
237 depression. Poor health perception, on the other hand, can lead to health-related worry, which can  
238 lead to depression and other mental health difficulties [36, 37].

239

240 Our findings may need to be interpreted cautiously considering the following issues. The study  
241 respondents were not screened for pre-existing mental health disorders. Patients with a history of  
242 mental disorder would be more likely to have depression or poor mental health post-COVID [38]. The  
243 lockdown implemented during the pandemic may also affected the mental health status of the general  
244 population. According to an online survey from Yee et al [39], mild-to-severe depression was found  
245 in 28% of the Malaysian community.

246

247 We did not investigate the death or serious illness due to COVID-19 of a loved one or loss of income,  
248 which may also have a great influence on mental health [11, 40]. Since our study sample consisted of  
249 respondents recruited through online platforms, there may be selection bias where the older and less  
250 educated individuals were not adequately represented. Future research should be designed as a  
251 prospective cohort study where risk factors of depression among these COVID-19 survivors could be  
252 established before depression.

253

254 On the other hand, our study may be one of the few that investigated the state of mild to severe  
255 depression of COVID-19 survivors from the Asian region as well as being the first in Malaysia. Our  
256 findings support earlier studies that mental health state, especially in the form of depression among  
257 COVID-19 survivors should not be overlooked. Even a small percentage of them having mental health  
258 disorders might result in a big number of individuals in our nation and throughout the world. Mental  
259 disorders are frequently overlooked throughout both the acute and chronic phases of COVID-19,  
260 despite the fact that depressive disorders are linked to a much higher risk of death from other causes  
261 [41].

262

263 Our findings should be utilised to raise awareness of COVID-19 survivors' increased risk of mental  
264 health issues and to advocate for mental healthcare integration as a major component of post-COVID-  
265 19 treatment plans. The programmes should be tailored based on the above-mentioned risk factors.  
266 Clinicians treating COVID-19 survivors should also be educated on the vulnerability of these patients  
267 for depression. As the pandemic progresses, new virus variants emerge, acute COVID-19 treatment  
268 options improve, and vaccination uptake rises, the epidemiology of mental health outcomes in the  
269 post-acute phase of COVID-19 is anticipated to change over time [42].

270

#### 271 **Conclusions:**

272 A substantial proportion of COVID-19 survivors were found to have mild to severe depression.  
273 Females, younger age groups, overweight/obesity, Long COVID and perceived poor health were  
274 factors associated with the odds of mild to severe depression. Strengthening access to mental health  
275 services such as early assessment and prompt treatment should be incorporated as a core component  
276 in the post-COVID-19 care strategies, targeting at those risk factors.

277

278 **References:**

- 279 1. Yuki K, Fujiogi M, Koutsogiannaki S. COVID-19 pathophysiology: A review. *Clin Immunol.*  
280 2020;215:108427. Epub 2020/04/24. doi: 10.1016/j.clim.2020.108427.
- 281 2. Amsalem D, Dixon LB, Neria Y. The Coronavirus Disease 2019 (COVID-19) Outbreak and  
282 Mental Health: Current Risks and Recommended Actions. *JAMA Psychiatry.* 2021;78(1):9-10. Epub  
283 2020/06/25. doi: 10.1001/jamapsychiatry.2020.1730. PubMed PMID: 32579160.
- 284 3. Xiang Y, Yang Y, Li W, Zhang L, Zhang Q, Cheung T, et al. Timely mental health care for the  
285 2019 novel coronavirus outbreak is urgently needed. *Lancet Psychiatry.* 2020;7:228–9.
- 286 4. Thyre AY, Law JW, Tan LT, Pusparajah P, Ser HL, Thurairajasingam S, et al. Psychological  
287 Symptoms in COVID-19 Patients: Insights into Pathophysiology and Risk Factors of Long COVID-19.  
288 *Biology.* 2022;11(1). Epub 2022/01/22. doi: 10.3390/biology11010061. PubMed PMID: 35053059;  
289 PubMed Central PMCID: PMCPCMC8773222.
- 290 5. Rogers JP, Chesney E, Oliver D, Pollak TA, McGuire P, Fusar-Poli P, et al. Psychiatric and  
291 neuropsychiatric presentations associated with severe coronavirus infections: a systematic review  
292 and meta-analysis with comparison to the COVID-19 pandemic. *Lancet Psychiatry.* 2020;7(7):611-27.  
293 Epub 2020/05/22. doi: 10.1016/S2215-0366(20)30203-0. PubMed PMID: 32437679; PubMed Central  
294 PMCID: PMCPCMC7234781.
- 295 6. Al-Aly Z, Xie Y, Bowe B. High-dimensional characterization of post-acute sequelae of COVID-  
296 19. *Nature.* 2021;594(7862):259-64. Epub 2021/04/23. doi: 10.1038/s41586-021-03553-9. PubMed  
297 PMID: 33887749.
- 298 7. Taquet M, Dercon Q, Luciano S, Geddes JR, Husain M, Harrison PJ. Incidence, co-occurrence,  
299 and evolution of long-COVID features: A 6-month retrospective cohort study of 273,618 survivors of  
300 COVID-19. *PLoS Med.* 2021;18(9):e1003773-e. doi: 10.1371/journal.pmed.1003773. PubMed PMID:  
301 34582441.
- 302 8. Xie Y, Xu E, Al-Aly Z. Risks of mental health outcomes in people with covid-19: cohort study.  
303 *BMJ (Clinical research ed).* 2022;376:e068993. Epub 2022/02/18. doi: 10.1136/bmj-2021-068993.  
304 PubMed PMID: 35172971.
- 305 9. Renaud-Charest O, Lui LMW, Eskander S, Ceban F, Ho R, Di Vincenzo JD, et al. Onset and  
306 frequency of depression in post-COVID-19 syndrome: A systematic review. *Journal of Psychiatric*  
307 *Research.* 2021;144:129-37. doi: <https://doi.org/10.1016/j.jpsychires.2021.09.054>.
- 308 10. Mei Q, Wang F, Bryant A, Wei L, Yuan X, Li J. Mental health problems among COVID-19  
309 survivors in Wuhan, China. *World psychiatry : official journal of the World Psychiatric Association*  
310 *(WPA).* 2021;20(1):139-40. Epub 2021/01/13. doi: 10.1002/wps.20829. PubMed PMID: 33432745;  
311 PubMed Central PMCID: PMCPCMC7801855.
- 312 11. Mousavi SA, Hooshyari Z, Ahmadi A. The Most Stressful Events during the COVID-19  
313 Epidemic. *Iran J Psychiatry.* 2020;15(3):220-7. Epub 2020/11/17. doi: 10.18502/ijps.v15i3.3814.  
314 PubMed PMID: 33193770; PubMed Central PMCID: PMCPCMC7603585.
- 315 12. Hoveling LA, Liefbroer AC, Schwaren LJS, Bültmann U, Smidt N. Socioeconomic differences in  
316 major depressive disorder onset among adults are partially explained by lifestyle factors: A  
317 longitudinal analysis of the Lifelines Cohort Study. *J Affect Disord.* 2022. Epub 2022/07/20. doi:  
318 10.1016/j.jad.2022.06.018. PubMed PMID: 35850289.

- 319 13. KKMNOW, COVID-19 -The latest data on the pandemic in Malaysia (as of 08.12.2022)  
320 [Internet]. 2022 [cited 09.12.2022]. Available from: <https://data.moh.gov.my/covid>.
- 321 14. Houben-Wilke S, Goërtz YM, Delbressine JM, Vaes AW, Meys R, Machado FV, et al. The  
322 Impact of Long COVID-19 on Mental Health: Observational 6-Month Follow-Up Study. *JMIR mental*  
323 *health*. 2022;9(2):e33704. Epub 2022/02/25. doi: 10.2196/33704. PubMed PMID: 35200155;  
324 PubMed Central PMCID: PMCPCMC8914795.
- 325 15. Villalpando JMG, Forcelledo HA, Castillo JLB, Sastre AJ, Rojop IEJ, Hernandez VO, et al.  
326 COVID-19, Long COVID Syndrome, and Mental Health Sequelae in a Mexican Population. *Int J*  
327 *Environ Res Public Health*. 2022;19(12). Epub 2022/06/25. doi: 10.3390/ijerph19126970. PubMed  
328 PMID: 35742219; PubMed Central PMCID: PMCPCMC9222368.
- 329 16. Titze-de-Almeida R, da Cunha TR, Dos Santos Silva LD, Ferreira CS, Silva CP, Ribeiro AP, et al.  
330 Persistent, new-onset symptoms and mental health complaints in Long COVID in a Brazilian cohort of  
331 non-hospitalized patients. *BMC infectious diseases*. 2022;22(1):133. Epub 2022/02/10. doi:  
332 10.1186/s12879-022-07065-3. PubMed PMID: 35135496; PubMed Central PMCID:  
333 PMCPCMC8821794.
- 334 17. Harris PA, Taylor R, Minor BL, Elliott V, Fernandez M, O'Neal L, et al. The REDCap consortium:  
335 Building an international community of software platform partners. *J Biomed Inform*.  
336 2019;95:103208. Epub 2019/05/13. doi: 10.1016/j.jbi.2019.103208. PubMed PMID: 31078660;  
337 PubMed Central PMCID: PMCPCMC7254481.
- 338 18. Harris PA, Taylor R, Thielke R, Payne J, Gonzalez N, Conde JG. Research electronic data  
339 capture (REDCap)--a metadata-driven methodology and workflow process for providing translational  
340 research informatics support. *J Biomed Inform*. 2009;42(2):377-81. Epub 2008/10/22. doi:  
341 10.1016/j.jbi.2008.08.010. PubMed PMID: 18929686; PubMed Central PMCID: PMCPCMC2700030.
- 342 19. National Institute for Health and Care Excellence. COVID-19 rapid guideline: managing the  
343 long-term effects of COVID-19 NICE guideline; <https://www.nice.org.uk/guidance/ng188>. 2020.
- 344 20. Kroenke K, Spitzer RL, Williams JB. The PHQ-9: validity of a brief depression severity  
345 measure. *Journal of general internal medicine*. 2001;16(9):606-13. Epub 2001/09/15. doi:  
346 10.1046/j.1525-1497.2001.016009606.x. PubMed PMID: 11556941; PubMed Central PMCID:  
347 PMCPCMC1495268.
- 348 21. Wu C, Hu X, Song J, Yang D, Xu J, Cheng K, et al. Mental health status and related influencing  
349 factors of COVID-19 survivors in Wuhan, China. *Clinical and translational medicine*. 2020;10(2):e52.  
350 Epub 2020/06/09. doi: 10.1002/ctm2.52. PubMed PMID: 32508037; PubMed Central PMCID:  
351 PMCPCMC7300592.
- 352 22. Xiao X, Yang X, Zheng W, Wang B, Fu L, Luo D, et al. Depression, anxiety and post-traumatic  
353 growth among COVID-19 survivors six-month after discharge. *European journal of*  
354 *psychotraumatology*. 2022;13(1):2055294. Epub 2022/04/12. doi: 10.1080/20008198.2022.2055294.  
355 PubMed PMID: 35401948; PubMed Central PMCID: PMCPCMC8986234.
- 356 23. Levis B, Benedetti A, Thombs BD. Accuracy of patient health questionnaire-9 (PHQ-9) for  
357 screening to detect major depression: Individual participant data meta-analysis. *BMJ (Clinical*  
358 *research ed)*. 2019;365:l1476. doi: 10.1136/bmj.l1476.

- 359 24. Hosmer D, Lemeshow S. Model-building strategies and methods for logistic regression. . In:  
360 Shewhart W, Wilks S, editors. Applied Logistic Regression. Hoboken, New Jersey: John Wiley & Sons;  
361 2005.
- 362 25. Institute for Public Health. National Health and Morbidity Survey (NHMS) 2019: Non-  
363 communicable diseases, healthcare demand, and health literacy—Key Findings. Putrajaya: 2020.
- 364 26. Moy FM, Hairi NN, Lim ERJ, Bulgiba A. Long COVID and its associated factors among COVID  
365 survivors in the community from a middle-income country-An online cross-sectional study. PloS one.  
366 2022;17(8):e0273364. Epub 2022/08/31. doi: 10.1371/journal.pone.0273364. PubMed PMID:  
367 36040960; PubMed Central PMCID: PMCPCMC9426885.
- 368 27. Michelen M, Manoharan L, Elkheir N, Cheng V, Dagens A, Hastie C, et al. Characterising long  
369 COVID: a living systematic review. BMJ Glob Health. 2021;6(9):e005427. doi: 10.1136/bmjgh-2021-  
370 005427.
- 371 28. van Kessel SAM, Olde Hartman TC, Lucassen P, van Jaarsveld CHM. Post-acute and long-  
372 COVID-19 symptoms in patients with mild diseases: a systematic review. Fam Pract. 2022;39(1):159-  
373 67. Epub 2021/07/17. doi: 10.1093/fampra/cmab076. PubMed PMID: 34268556; PubMed Central  
374 PMCID: PMCPCMC8414057.
- 375 29. Staneva A, Carmignani F, Rohde N. Personality, gender, and age resilience to the mental  
376 health effects of COVID-19. Soc Sci Med. 2022;301:114884. Epub 2022/03/29. doi:  
377 10.1016/j.socscimed.2022.114884. PubMed PMID: 35344776; PubMed Central PMCID:  
378 PMCPCMC8915456.
- 379 30. Dupuis ML, Maselli A, Pagano MT, Pierdominici M, Ortona E. Immune response and  
380 autoimmune diseases: a matter of sex. Italian Journal of Gender-Specific Medicine. 2019;5(1):11-20.
- 381 31. Bucciarelli V, Nasi M, Bianco F, Seferovic J, Ivkovic V, Gallina S, et al. Depression pandemic  
382 and cardiovascular risk in the COVID-19 era and long COVID syndrome: Gender makes a difference.  
383 Trends in cardiovascular medicine. 2022;32(1):12-7. Epub 2021/10/08. doi:  
384 10.1016/j.tcm.2021.09.009. PubMed PMID: 34619336; PubMed Central PMCID: PMCPCMC8490128.
- 385 32. Cohen S, Murphy M, Prather A. Ten Surprising Facts About Stressful Life Events and Disease  
386 Risk Annu Rev Psychol. 2019;70:577- 97.
- 387 33. Rossi R, Jannini TB, Socci V, Pacitti F, Lorenzo GD. Stressful Life Events and Resilience During  
388 the COVID-19 Lockdown Measures in Italy: Association With Mental Health Outcomes and Age.  
389 Front Psychiatry. 2021;12:635832. Epub 2021/03/26. doi: 10.3389/fpsy.2021.635832. PubMed  
390 PMID: 33762980; PubMed Central PMCID: PMCPCMC7982412.
- 391 34. Luppino FS, de Wit LM, Bouvy PF, Stijnen T, Cuijpers P, Penninx BWJH, et al. Overweight,  
392 Obesity, and Depression: A Systematic Review and Meta-analysis of Longitudinal Studies. Archives of  
393 General Psychiatry. 2010;67(3):220-9. doi: 10.1001/archgenpsychiatry.2010.2 %J Archives of General  
394 Psychiatry.
- 395 35. Han Q, Zheng B, Daines L, Sheikh A. Long-Term Sequelae of COVID-19: A Systematic Review  
396 and Meta-Analysis of One-Year Follow-Up Studies on Post-COVID Symptoms. Pathogens. 2022;11(2).  
397 Epub 2022/02/27. doi: 10.3390/pathogens11020269. PubMed PMID: 35215212; PubMed Central  
398 PMCID: PMCPCMC8875269.

- 399 36. Cappeliez P, Sèvre-Rousseau S, Landreville P, Prévaille M, Scientific Committee of ESAS.  
400 Physical health, subjective health, and psychological distress in older adults: Reciprocal relationships  
401 concurrently and over time. *Ageing International*. 2004;29(3):247-66. doi: 10.1007/s12126-996-  
402 1001-y.
- 403 37. Lee K, Feltner F, Bailey A, Lennie T, Chung M, Smalls B, et al. The relationship between  
404 psychological states and health perception in individuals at risk for cardiovascular disease *Psychol*  
405 *Res Behav Manag*. 2019;12:317-24. doi: <https://doi.org/10.2147/PRBM.S198280>.
- 406 38. Henssler J, Stock F, van Bohemen J, Walter H, Heinz A, Brandt L. Mental health effects of  
407 infection containment strategies: quarantine and isolation—a systematic review and meta-analysis  
408 *Eur Arch Psychiatry Clin Neurosci*. 2021:[https:// doi. org/ 10. 1007/ s00406- 020- 1196-x](https://doi.org/10.1007/s00406-020-1196-x).
- 409 39. Yee A, Hodori NM, Tung YZ, Ooi PL, Latif S, Isa HM, et al. Depression level and coping  
410 responses toward the movement control order and its impact on quality of life in the Malaysian  
411 community during the COVID-19 pandemic: a web-based cross-sectional study. *Ann Gen Psychiatry*.  
412 2021;20(1):31. Epub 2021/05/26. doi: 10.1186/s12991-021-00352-4. PubMed PMID: 34030704;  
413 PubMed Central PMCID: PMCPCMC8142880.
- 414 40. Ferrando SJ, Klepacz L, Lynch S, Shahar S, Dornbush R, Smiley A, et al. Psychiatric  
415 emergencies during the height of the COVID-19 pandemic in the suburban New York City area. *J*  
416 *Psychiatr Res*. 2021;136:552-9. Epub 2020/11/08. doi: 10.1016/j.jpsychires.2020.10.029. PubMed  
417 PMID: 33158555; PubMed Central PMCID: PMCPCMC7992036.
- 418 41. Cuijpers P, Vogelzangs N, Twisk J, Kleiboer A, Li J, Penninx BW. Comprehensive Meta-Analysis  
419 of Excess Mortality in Depression in the General Community Versus Patients With Specific Illnesses.  
420 *Am J Psychiatry*. 2014;171(4):453-62. doi: 10.1176/appi.ajp.2013.13030325. PubMed PMID:  
421 24434956.
- 422 42. Cai M, Bowe B, Xie Y, Al-Aly Z. Temporal trends of COVID-19 mortality and hospitalisation  
423 rates: an observational cohort study from the US Department of Veterans Affairs. *BMJ open*.  
424 2021;11(8):e047369. Epub 2021/08/18. doi: 10.1136/bmjopen-2020-047369. PubMed PMID:  
425 34400452; PubMed Central PMCID: PMCPCMC8370839.

426

#### 427 **Declaration:**

#### 428 **Ethics approval and consent to participate**

429 Ethical clearance was obtained from the University of Malaya Research Ethics Committee  
430 (Reference number: UM.TNC2/UMREC\_1439). Written informed consent was obtained from all  
431 participants. The study was conducted in compliance with recognized international standards,  
432 including the principles of the Declaration of Helsinki. All procedures were performed in  
433 accordance with relevant guidelines.

#### 434 **Consent for publication**

435 Not applicable

436 **Availability of data and materials**

437 All data generated or analysed during this study are included in this published article [and its  
438 supplementary information files].

439 **Competing interests**

440 The authors declare that they have no competing interests.

441 **Funding**

442 This study is part of the COVID-19 Epidemiological Analysis and Strategies (CEASe) Project with  
443 funding from the Ministry of Science, Technology and Innovation (UM.0000245/HGA.GV).

444 **Authors' contributions**

445 FMM, NNH and AB contributed to the conception of the work; FMM worked on the acquisition,  
446 analysis, and interpretation of data; FMM, NNH, ERJL and AB contributed to the drafting,  
447 finalizing and approval of the submitted version. All authors agreed to be personally  
448 accountable for the author's own contributions and to ensure that questions related to the  
449 accuracy or integrity of any part of the work.

450 **Acknowledgements**

451 The respondents and the support from the University Malaya are acknowledged.
